# Supplementary material for: Linking Profiles of Pathway Activation with Clinical Motor Improvements – a Retrospective Computational Study
Source: bioRxiv or medRxiv preprint supplement (doi:10.1101/2021.10.08.21264743), 2021-10-11
Supplement: Supplementary file [file media-1.pdf]

# Supplementary Material

## Suppl. 1

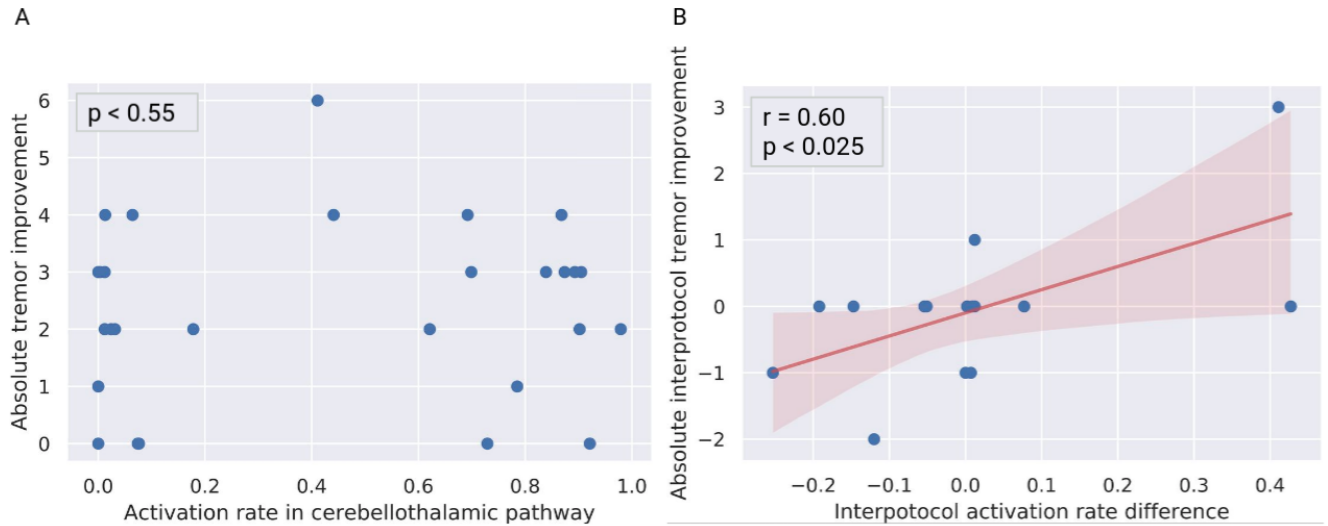

Effect of activation in the cerebellothalamic pathway on tremor alleviation. A: there was no correlation observed between activation rates and tremor improvement from baseline. B: interpotocol difference in activation rates correlated with the corresponding difference in the tremor scores.

## Suppl. 2

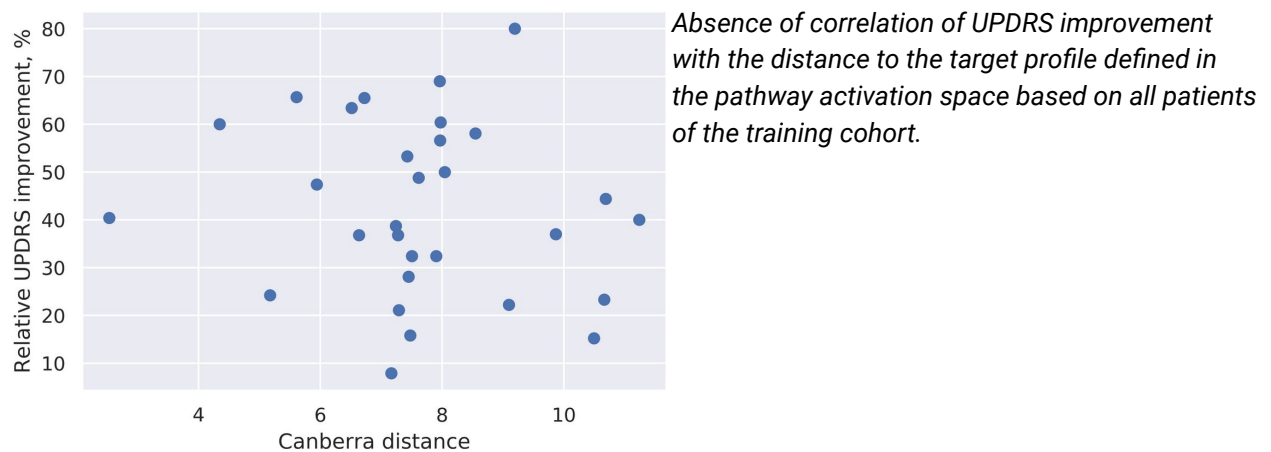

### Suppl. 3

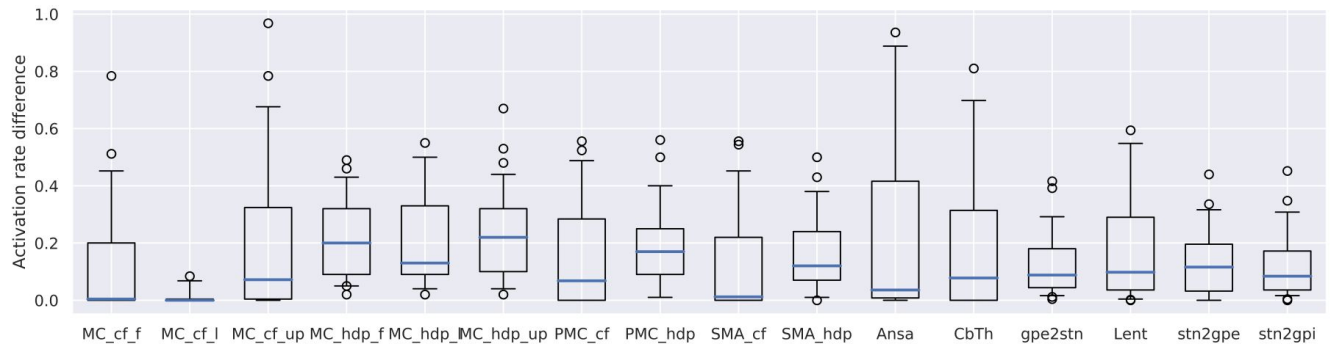

*Box plot of absolute difference of activation rates computed separately for both hemispheres across both cohorts. MC and PMC refer to the primary and premotor cortical regions, SMA -- supplementary motor area; cf and hdp are the corticofugal and the hyperdirect pathways, respectively; Ansa -- ansa lenticularis, Lent -- lenticular fasciculus, CbTh -- cerebellothalamic pathway; l, f, up - lower extremity, face-neck region, and upper extremity in the primary motor cortex.*
